# Supplementary material
Source: publisher site journal article supplement (https://www.dovepress.com/get_supplementary_file.php?f=341855.xlsx)
Supplement: Supplementary file 1 [file get_supplementary_file.php]

## Sheet: Fill rate 
To each tracer product, enter the quantity that was ordered (from RRF) and the quantity that was supplied (from goods receiving vouchers)
Item category	Description of Tracer products	Unit of transaction	Quantity Ordered in 6months before Covid-19 [Sep 2019 to Feb, 2020]	Quantity Received in 6months before Covid-19 [Sep 2019 to Feb, 2020]	Quantity Ordered in 6months during Covid-19 [Mar to Aug, 2020]	Quantity Received in 6months before Covid-19 [Mar to Aug, 2020]
ARV	Lamivudine (3TC) + Dolutegravir (DTG) + Tenofovir (TDF) - (300mg + 50mg + 300mg) - Tablet	30
	HIV Rapid test kit assay 1 - Statpack - of 20 tests [for screening]	20 tests
Anti-TB	RHZE(Rifampicin+Isoniazide+pyrazinamide+Ethambutol) - (150mg+75mg+400mg+275mg) of 6x28 + RH(Rifampicin+ Isoniazid)- (150mg+75mg) of 12x28	Kit
	RHZ (Rifampicin+Isoniazid+pyrazinamide) - (75mg+50mg+150mg) - Tablet	28x3
FHC	Medroxyprogesterone Acetate - 150mg/ml in 1ml vial - injection (aqueous suspension) with syring (3 or 2ml ) 21G needle.	Vial
	Etonogestrel - 68mg Capsule (Subdermal Implant) with insertion/removal accessory - in Kit	Each
Anti-malarials	Serology – Malaria, Rapid Diagnostic Test (mRDT), PF & PV Cassette, in 25 tests	25 tests
	Artemether + Lumefanthrine (20 +120)mg 6X4 Tablet	30
	Artesunate 60mg vial injection	Vial
Vaccines	DTP-Hib-Hep (Pentavalent) Vaccine	1Dose
MCH	Oral rehydration salts (Sodium Chloride + Trisodum Citrate dihydrate + Potassium Chloride + Glucose) (3.5 g + 2.9 mg + 1.5 mg + 20 mg) Powder	Sachet
	Ferrous sulphate + Folic Acid (200mg + 0.4 mg) Tablet	100
	Oxytocin 10IU/ml in 1ml Injection	50
RDF Vital medicines	Hydrochlorothiazide - 25mg – Tablet	10x10
	Enalapril Maleate - 5mg – Tablet	10x10
	Metformin - 500mg – Tablet	10x10
	Adrenaline (Epinephrine) - 0.1% in 1ml ampoule –Injection	10
	Amoxicillin - 500mg – Capsule	50x10
	Ceftriaxone - 1g in vial - powder for Injection with 10ml diluent	Vial
	Cimetidine - 200mg/ml in 2ml ampoule - Injection	10
	Ciprofloxacin - 500mg – Tablet	10x10
	Glove examination latex non-powdered - all sizes (Large, Medium or Small)	100
	Paracetamol - 500mg – Tablet	100x10
	Phenobarbitone (Phenobarbital) - 100mg - Tablet	1000
	Sodium Chloride (Normal Saline) - 0.009 - Intravenous Infusion with giving Set	1000ml

## Sheet: Distribution trend
	To each tracer product, enter the quantity that was issued or distributed from the issuing forms [instead of Jul 2020, record Sep 2020 transaction data]
S.No	Description of selected Tracer products	Unit of transaction	2019-09-30	2019-10-30	2019-11-30	2019-12-31	2020-01-31	2020-02-28	2020-03-31	2020-04-30	2020-05-31	2020-06-30	2020-08-31	2020-09-30
1	Lamivudine (3TC) + Dolutegravir (DTG) + Tenofovir (TDF) - (300mg + 50mg + 300mg) - Tablet	30
2	HIV Rapid test kit assay 1 - Statpack - of 20 tests [for screening]	20 tests
3	RHZE(Rifampicin+Isoniazide+pyrazinamide+Ethambutol) - (150mg+75mg+400mg+275mg) of 6x28 + RH(Rifampicin+ Isoniazid)- (150mg+75mg) of 12x28	Kit
4	RHZ (Rifampicin+Isoniazid+pyrazinamide) - (75mg+50mg+150mg) - Tablet	28x3
5	Medroxyprogesterone Acetate - 150mg/ml in 1ml vial - injection (aqueous suspension) with syring (3 or 2ml ) 21G needle.	Vial
6	Etonogestrel - 68mg Capsule (Subdermal Implant) with insertion/removal accessory - in Kit	Each
7	Serology – Malaria, Rapid Diagnostic Test (mRDT), PF & PV Cassette, in 25 tests	25 tests
8	Artemether + Lumefanthrine (20 +120)mg 6X4 Tablet	30
9	Artesunate 60mg vial injection	Vial
10	DTP-Hib-Hep (Pentavalent) Vaccine	1Dose
11	Oral rehydration salts (Sodium Chloride + Trisodum Citrate dihydrate + Potassium Chloride + Glucose) (3.5 g + 2.9 mg + 1.5 mg + 20 mg) Powder	Sachet
12	Ferrous sulphate + Folic Acid (200mg + 0.4 mg) Tablet	100
13	Oxytocin 10IU/ml in 1ml Injection	50
14	Hydrochlorothiazide - 25mg – Tablet	10x10
15	Enalapril Maleate - 5mg – Tablet	10x10
16	Metformin - 500mg – Tablet	10x10
17	Adrenaline (Epinephrine) - 0.1% in 1ml ampoule –Injection	10
18	Amoxicillin - 500mg – Capsule	50x10
19	Ceftriaxone - 1g in vial - powder for Injection with 10ml diluent	Vial
20	Cimetidine - 200mg/ml in 2ml ampoule - Injection	10
21	Ciprofloxacin - 500mg – Tablet	10x10
22	Glove examination latex non-powdered - all sizes (Large, Medium or Small)	100
23	Paracetamol - 500mg – Tablet	100x10
24	Phenobarbitone (Phenobarbital) - 100mg - Tablet	1000
25	Sodium Chloride (Normal Saline) - 0.009 - Intravenous Infusion with giving Set	1000ml

## Sheet: Stock Status
	Usable stock on hand at time of data collection and duration of stock-out collection tool
S.No	Description of Tracer products	Unit of transaction	Ending Balance (EB) at the time of data collection	Days out of stock during Covid-19
1	Lamivudine (3TC) + Dolutegravir (DTG) + Tenofovir (TDF) - (300mg + 50mg + 300mg) - Tablet	30
2	HIV Rapid test kit assay 1 - Statpack - of 20 tests [for screening]	20 tests
3	RHZE(Rifampicin+Isoniazide+pyrazinamide+Ethambutol) - (150mg+75mg+400mg+275mg) of 6x28 + RH(Rifampicin+ Isoniazid)- (150mg+75mg) of 12x28	Kit
4	RHZ (Rifampicin+Isoniazid+pyrazinamide) - (75mg+50mg+150mg) - Tablet	28x3
5	Medroxyprogesterone Acetate - 150mg/ml in 1ml vial - injection (aqueous suspension) with syring (3 or 2ml ) 21G needle.	Vial
6	Etonogestrel - 68mg Capsule (Subdermal Implant) with insertion/removal accessory - in Kit	Each
7	Serology – Malaria, Rapid Diagnostic Test (mRDT), PF & PV Cassette, in 25 tests	25 tests
8	Artemether + Lumefanthrine (20 +120)mg 6X4 Tablet	30
9	Artesunate 60mg vial injection	Vial
10	DTP-Hib-Hep (Pentavalent) Vaccine	1Dose
11	Oral rehydration salts (Sodium Chloride + Trisodum Citrate dihydrate + Potassium Chloride + Glucose) (3.5 g + 2.9 mg + 1.5 mg + 20 mg) Powder	Sachet
12	Ferrous sulphate + Folic Acid (200mg + 0.4 mg) Tablet	100
13	Oxytocin 10IU/ml in 1ml Injection	50
14	Hydrochlorothiazide - 25mg – Tablet	10x10
15	Enalapril Maleate - 5mg – Tablet	10x10
16	Metformin - 500mg – Tablet	10x10
17	Adrenaline (Epinephrine) - 0.1% in 1ml ampoule –Injection	10
18	Amoxicillin - 500mg – Capsule	50x10
19	Ceftriaxone - 1g in vial - powder for Injection with 10ml diluent	Vial
20	Cimetidine - 200mg/ml in 2ml ampoule - Injection	10
21	Ciprofloxacin - 500mg – Tablet	10x10
22	Glove examination latex non-powdered - all sizes (Large, Medium or Small)	100
23	Paracetamol - 500mg – Tablet	100x10
24	Phenobarbitone (Phenobarbital) - 100mg - Tablet	1000
25	Sodium Chloride (Normal Saline) - 0.009 - Intravenous Infusion with giving Set	1000ml
